# Supplementary material for: Drosophila Ric-8 interacts with the Gα12/13 subunit, Concertina, during activation of the Folded gastrulation pathway
Source: PubMed Central journal article supplement — Mol Biol Cell. 2013 Nov 1;24(21):3460–71. doi: 10.1091/mbc.E12-11-0813 (PMC3818808; doi:10.1091/mbc.e12-11-0813), 2013-11-01

# Supplemental Materials

*Molecular Biology of the Cell*

Peters et al.

## Supplemental Figures

Supplemental Figure 1: Ric-8 is depleted by dsRNAs directed against the 5'/3' UTR of the gene. Protein levels were determined by immunoblot with anti-Ric-8 and an antibody to  $\alpha$ -tubulin was used as a loading control.

Supplemental Figure 2: Myc-tagged Cta functions as a proxy for wild-type and constitutively inactive Cta. (A) Expression of Myc-Cta rescues the ability of cells depleted of endogenous Cta to respond to Fog. Transfected cells were identified using an anti-Myc antibody. Scale bar= 20  $\mu$ m. (B) Myc-Cta can rescue constriction in response to Fog in the absence of endogenous Cta, while constitutively inactive Myc-Cta<sub>GA</sub> cannot. Quantification shows percentage of S2R+ cells within a population transfected with Myc-Cta or Myc-Cta<sub>GA</sub> depleted of endogenous Cta able to contract in response to Fog application ( $\pm$ SEM).

Supplemental Figure 3: Membrane localization of Cta is reduced in the absence of Ric-8. (A) Myc-Cta localizes to the membrane in cells treated with control dsRNA. (B) Myc-Cta localization is decreased at the membrane in cells treated with Ric-8 dsRNA. S2 cells were treated with either control or Ric-8 dsRNA and stained for Myc (green); Membrane=Gap43 cherry expression (magenta). Note the enrichment of Cta in the membrane ruffles, shown in insets, which is absent in cells treated with Ric-8 RNAi. Enlarged images of boxed areas are shown in insets. Scale bar = 20  $\mu$ m.

Supplemental Figure 4: Mito-Ric-8-GFP co-localizes with a mitochondrial specific antibody. (A) S2 cells transfected with Mito-Ric-8-GFP co-localize with an antibody specific to mitochondria while (B) cells transfected with Ric-8GFP do not. Enlarged images of boxed areas are shown in insets. Scale bar = 20  $\mu$ m.

Supplemental Figure 5: Sequence alignment of Ric-8 across taxa reveals evolutionarily conserved residues. Residue clusters used for Ric-8 mutational analysis are highlighted in yellow. The number of the mutant cluster is indicated below its residues.

Supplemental Figure 6: Location of individual point mutants comprising mutant clusters that strongly inhibit Cta<sub>GA</sub> binding are mapped onto a structural model of Ric-8. Note that glutamic acid-487 is buried within the predicted molecule.

Supplemental Figure 7: Wild-type and constitutively active Cta exhibit differential binding to Ric-8 cluster mutants as compared to inactive Cta. (A-D) Similarly to Myc-Cta<sub>GA</sub>, both Myc-Cta and Myc-Cta<sub>QL</sub> are deficient in binding Ric-8-GFP cluster mutant 1. However, unlike Myc-Cta<sub>GA</sub>, Myc-Cta and Myc-Cta<sub>QL</sub> are capable of binding mutants 9, 10 and 13. (A) S2 Cells were transfected with GFP, Ric-8-GFP or cluster Ric-8-GFP mutants and wild-type Myc-Cta. IPs were performed with GFP-binding protein and probed with anti-GFP and anti-Myc. (B) Quantification of IPs presented in S7A. The pulldown:input ratios were determined using quantitative densitometry, and normalized to Ric-8-GFP ( $\pm$ SEM; error bars,  $p < 0.05$ ). (C) S2 Cells were transfected with GFP, Ric-8-GFP or cluster Ric-8-GFP mutants and Myc-Cta<sub>QL</sub>. IPs were performed with GFP-binding protein and probed with anti-GFP and anti-Myc. (D) Quantification of IPs presented in S7C. The pulldown:input ratios were determined using quantitative densitometry, and normalized to Ric-8-GFP ( $\pm$ SEM). Dashed lines indicate where two separate gels have been combined.

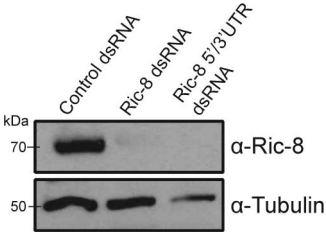

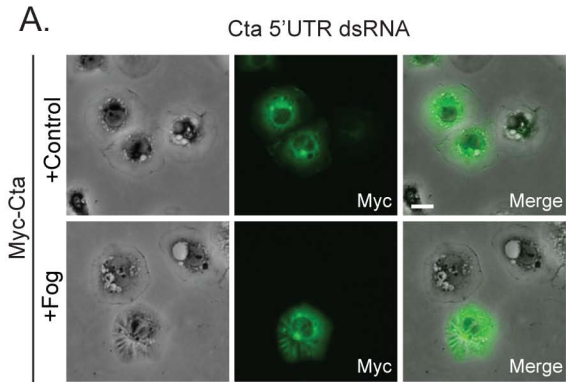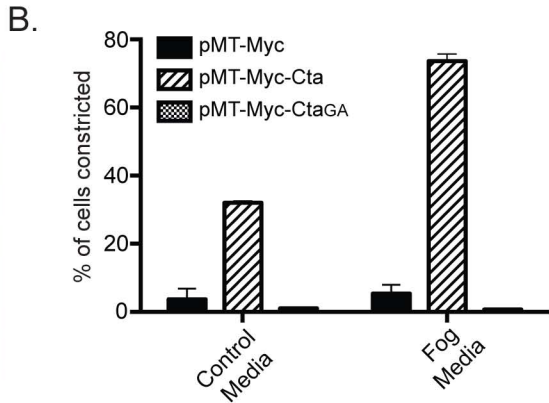

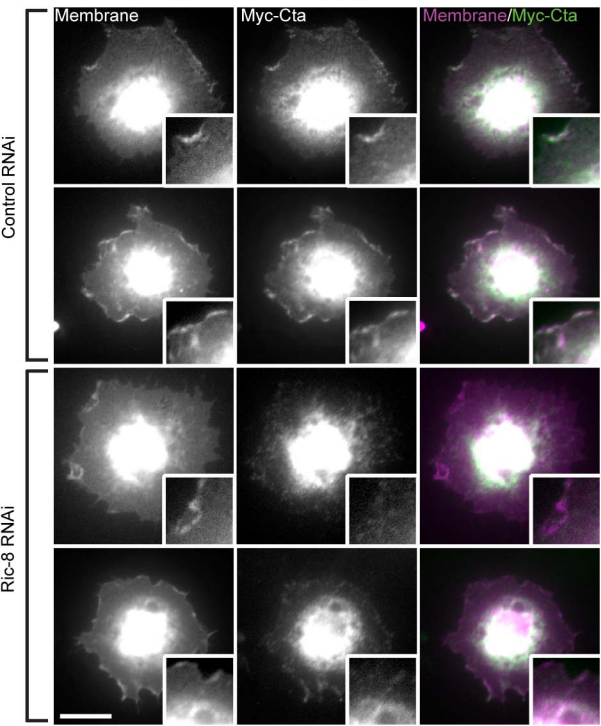

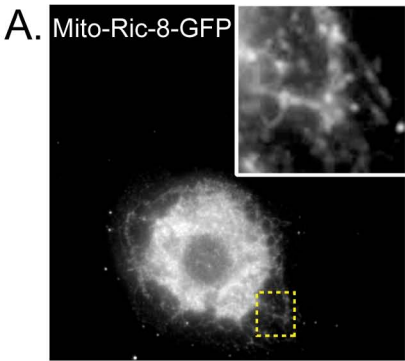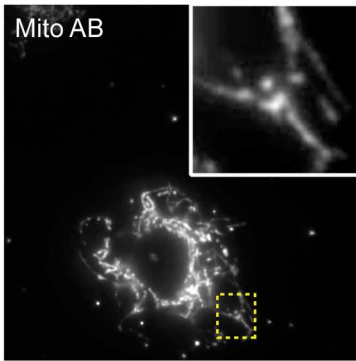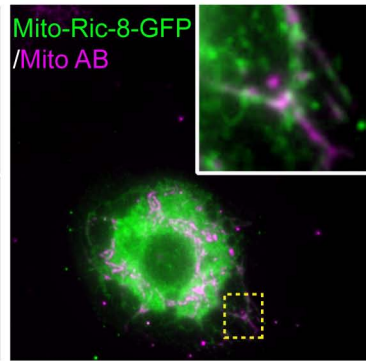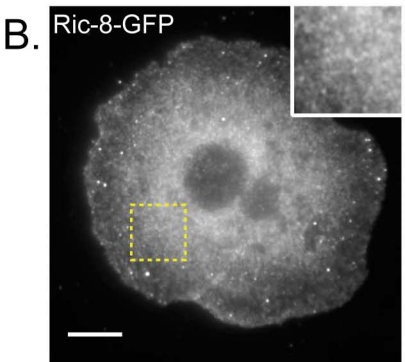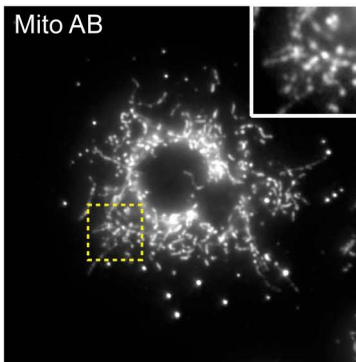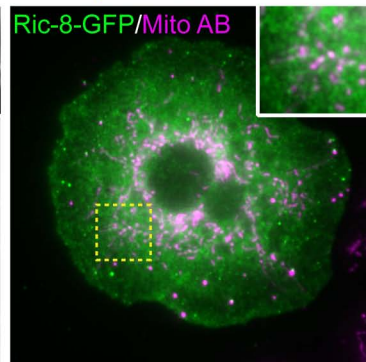

Xenopus MPAMD LGALLDELESGDQELVQKSLAEYNQENSQCFFFNAEQRE-ERKKLGELVISFLNR 59  
 Zebrafish ---MDLNAIIEKMETGDQDAAL TALQTYNKEKSQCFSFTSGEEE-DRERLGELVLSFLER 56  
 Mouse ---MEPRAVADALETGEEDAVTEALRSFNREHSQSFTFDDAQOE-DRKRLAKLLVSVLEQ 56  
 Chicken ---MELRTVVATVESGEQDAVLKVLQIYNQEKSQCFTFDDEERE-ERKKMAQLLIKFLER 56  
 Human -----RDYSDKHRATFKFESTDED-KRKKLCEGIFKVLIK 34  
 Drosophila ---METEHLKRLEAKEADHIPAILDEFNTKNADLLVDFSRFTDNLWHELWLAI F GILDD 56  
 : . : : \* : . . : . . \*

Xenopus DLQPSCQIACLETIRILSRDKYALSPFTGRSAIQTLAQYAGLDYS----- 104  
 Zebrafish DLQPSCQLACLETIRILSRDKKSLSPFATRHAMQILIRHAGLGQ----- 100  
 Mouse GLSPKHRVTWLQTIIRILSRDRSCLDSFASRQSLHALACYADITV----- 100  
 Chicken ELQPSCQVTCLESIRILSRDKYCLEPFTTEEGLKTLRSHAGIDY----- 100  
 Human DIPTTCQVSCLEVLRIILSRDKKVLVPVTTKENMQILLRLAKLINE----- 78  
 Drosophila QRLSHLHTQCLNTVRIITRDEFSLQNTYIEQEVNTLLKLARI EAGSLKLPATPDELKQEE 116  
 . : \* : \*\*\* : \*\* . \* . : : \* \* :

Mutant 1

Xenopus --EEMEMPCIPDGESAVEALRGLCNIIYNSVEAQEVAKDLRLVCGLARRLKLYNETRSSH 162  
 Zebrafish --GEGVTP EIPDLEVIVEALRCLCNIVFNS EAAQEAADLQLMVGLAERLKQCREPQWNH 158  
 Mouse --SEEPQPSPMDVLLSELKCLCNLVLS SPTAQMLAAEARLVVRLAERVGLYKRKSYPH 158  
 Chicken --SEELIREVPDLEVILESLKCLCNIVFSSPRAQELTAEARLVVGLTKRIKLYNERSLPH 158  
 Human --LDDSLEKVSEFPVIVESLKCLCNIVNSQMAQQLSLELNLAAKLCNLLRKKCKDRKFIN 136  
 Drosophila REEPQLEPSQAQSEVIAEALRCLCNLVFQSSDCRRRQCLRQHCLDAILKRVA--MRHPC 174  
 . : \* : \*\* \* : : . \* . : . : . : . :

Mutant 2

Xenopus ESKFFDLRLFLLLTALSVD MRRQLAQELRGVSLLLTDALESTLALKWSDIYEVVTDHLA-- 220  
 Zebrafish DVRFDDLRLTFLITALRVDVRAQLAHEL RGVSLLEALDATFGLCWPDMEYVARAGFDGC 218  
 Mouse EVQFFDLRLFLLLTALRVDV RQQLFQELHGVRLLLTDALELTGL-----VAPKENP-- 208  
 Chicken EVKFFDLRLFLLLTALRVDIRQQLAQELRGISLMTDTLELTLGVKWM DPYEVATEEGL-- 216  
 Human DIKCFDLRLFLLLSLLHTDIRSQLRYELQGLPLLTQILES AFTIKWTDEYESAIDHNG-- 194  
 Drosophila ALEY YDMKLLFLLLTALEPAARSRLQIDLNGLTYMTKWLD DDKLGE----- 218  
 . : : \* \* : : \* \* : \* : \* : \* : \* : : . : \* : :

Mutant 3

Xenopus ---PPLGKEETERVMEILKALFNITFDISRRREVDEEEAALYHHLAAILRHCLLRQSDGED 277  
 Zebrafish SELPPLGRQETERVMEILKILFNVT FDSNRRHVDEEEAATYRHLGAILRHCIMSSAEGEE 278  
 Mouse --PVMLPAQETERAMEILKVLFNITFDSVKREVDEEDAALYRYLGTLLRHCVMEVAAAG-D 265  
 Chicken --LPPLPRQETERAMEILKVLFNITFDSKREVDEEDAALYRHLGALLRHCLMISADGED 274  
 Human ---PPLSPQETDCAIEALKALFNVTVD SWKVHK-ESDSHQFRVMAAVLRHCLLIVGPTED 250  
 Drosophila ---DSVGEEQLNIICELLKVMFNVT SAP-DKSPNEYEIQSLHLTGVLRLELLRFFGDLATE 274  
 : : : \* \* : \* : \* : \* : \* : \* : \* : . . : . : :

Mutant 4

Xenopus RTEEFHGHTVNLVNLPLMCLDVLLTPKVEQG----- 309  
 Zebrafish RTEEMHSHTVNLGNLPLPCLDVLLMPKVQOG----- 310  
 Mouse RTEEFHGHTVNLGNLPLKCLDVLLALELHEG----- 297  
 Chicken RTEEFHSHTVNLGNLPLKCLDVLLTPKVRPG----- 306  
 Human KTEELHSN VNLVSNVPV SCLDVLICPLTHEETAQEATTLDELPSNKTAEK--ETVLKN 307  
 Drosophila KDRAVVT HAINLLTNISGSCLTELTLRCSNAELES HKEREQDNEKEKDT EAGAGAKPREC 334  
 : . . : : \* \* \* : : \* \* \* .

Mutant 5

Xenopus -SVEYMGNMNDTVEVLLQFLHRR LDR---GHKLREMLTPVLNLLTESSVHR ETRKFLRA 365  
 Zebrafish -SIEYMGVNM DAVKVLVEFM EKRLDR---GNLKETLLPSLNLLTESANIHRETRKFLRN 366  
 Mouse -SLEFMGVNMDVISALLAFLEKRLHQ---THRLKECVAPVLNVLTECARMHRPARKFLKA 353  
 Chicken -SLEYMGVNM DAVNILLDFLE RRLDR---GHKLKESLTPVLNLLTESANVHRQTRKFLKA 362  
 Human NTMVYNGMNEA IHVLLNFM EKRIDK---GSSYREGLTPVLSLLTECSNAHRNIRKFLKD 364  
 Drosophila CSQC FEKRNVRSLDVLLRYLRQSLAQQEA EASSHELLSPVLT VLVKCA SDRVMRHYLRQ 394  
 : : \* : : \* : : : : : : \* : \* \* : : \* : \* : \* : \* : \* : \* : \* :

Mutant 6





Mutant 1

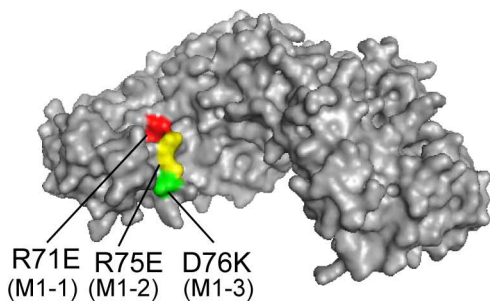

Mutant 9

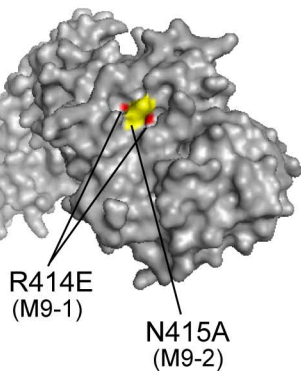

Mutant 10

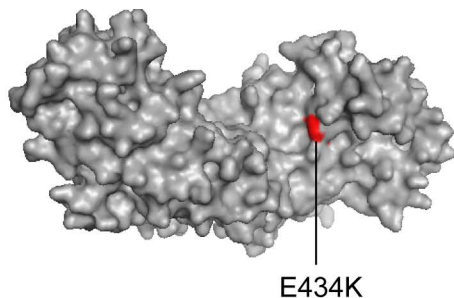

Mutant 13

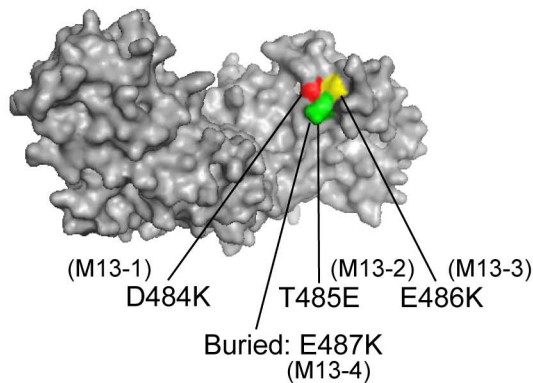

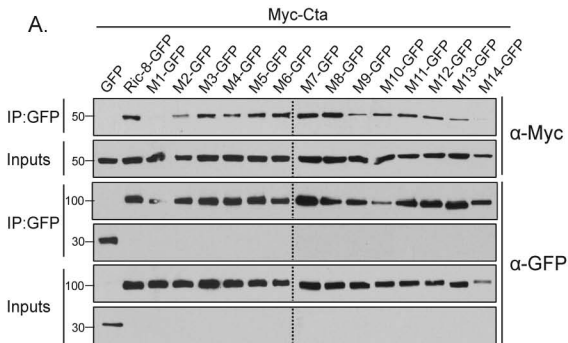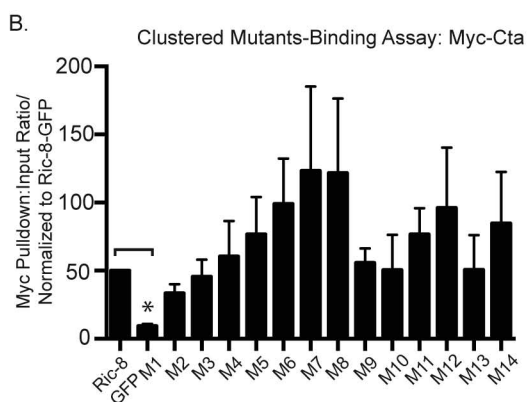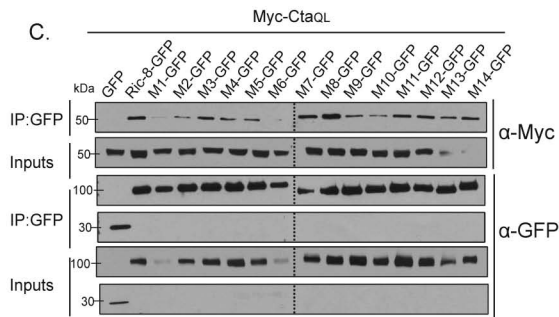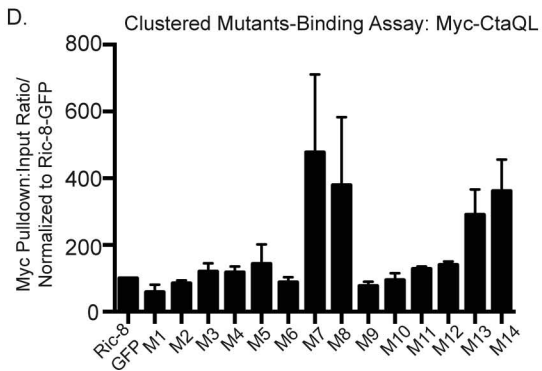

Supplement: supp_E12-11-0813_CombinedSupMats.pdf [file supp_E12-11-0813_CombinedSupMats.pdf]
